# Supplementary material for: Demographic and Genetic Predictors of ADHD Diagnoses and Medications in Electronic Health Records
Source: Research Square preprint supplement (doi:10.21203/rs.3.rs-7520845/v1), 2025-10-30
Supplement: Supplementary file 1 [file a3f592a4e05b110bbfb47ef4.docx]

**Supplementary Tables**

**Supplementary Table 1**

*ICD Codes for Stimulant-Prescribed Disorders*

| **Disorder** | **ICD-9 Codes** | **ICD-10 Codes** |
| --- | --- | --- |
| Attention-Deficit/Hyperactivity Disorder (ADHD) | 314.00, 314.01, 314.9 | F90.0, F90.1, F90.2, F90.8, F90.9 |
| Narcolepsy | 347.00, 347.01 | G47.4, G47.41, G47.419, G47.421, G47.429, G47.42, G47.8 |
| Bipolar Disorder | 296.0, 296.4, 296.5, 296.6, 296.7, 296.8, 296.9 | F31.0, F31.1, F31.2, F31.3, F31.4, F31.5, F31.6, F31.7, F31.8, F31.9 |
| Chronic Fatigue Syndrome | 780.71 | R53.82 |
| Depression | 296.30, 296.20 | F33.2 |
| Binge Eating Disorder | 307.51 | F50.81 |
| Abnormal Weight Gain | 783.1 | R63.5 |
| Obesity | 278.00, 278.01 | E66, E66.0, E66.1, E66.2, E66.3, E66.8, E66.9 |

**Supplementary Table 2**

*Stimulant Medications*

| **Stimulant Group** | **Medication Name** |
| --- | --- |
| Dextroamphetamine | Dexedrine, Dextroamphetamine transdermal patch (Xelstrym) |
| Dextroamphetamine & Amphetamine | Adderall, Adderall XR |
| Lisdexamfetamine | Vyvanse |
| Methylphenidate | Concerta, Metadate CD, Ritalin, Ritalin SR |
| Dexmethylphenidate | Focalin, Focalin XR |
